# Supplementary material for: Congenital limb deficiency in Japan: a cross-sectional nationwide survey on its epidemiology
Source: BMC Musculoskelet Disord. 2018 Jul 27;19:262. doi: 10.1186/s12891-018-2195-3 (PMC6064073; doi:10.1186/s12891-018-2195-3)
Supplement: Supplementary file 1 — Numbers of Total, Surveyed, and Responded Departments, and Breakdown of Responded Departments by Numbers of Reported Patients. This is the raw data used in the first survey of this study. (XLSX 12 kb) [file 12891_2018_2195_MOESM1_ESM.xlsx]

## Sheet: Table 4E
Numbers of total, surveyed, and responded eepartments, and breakdown of responded departments by numbers of reported patients
Strata	Total number of departments	Number of surveyed departments	Number of responded departments		Breakdown of responded departments
					Numbers of reported patients	0	1	2	3	4	5	6	7	8	9	10	11	12	13	14	15	19	20	23	24	25	29	40	76	140
Orthopedic surgery
University hospital	133	133	120			94	9	8	2	1		1	1		1		1	1		1
General hospital
≧500 beds	201	201	155			145	5	2	2	1
400-499 beds	213	170	135			135
300-399 beds	343	137	104			102	2
200-299 beds	391	79	59			59
100-199 beds	1006	100	75			73	1	1
≦99 beds	1950	96	64			64
Special stratum	79	79	65			32	10	4	4	1	1	1	1	2	2	1	1					1	1		1		1	1
Subtotal	4316	995	777
Pediatrics
University hospital	125	125	106			94	6	5		1
General hospital
≧500 beds	189	189	152			138	11		3
400-499 beds	193	154	128			124	3	1
300-399 beds	302	121	93			87	5																			1
200-299 beds	297	60	51			49	2
100-199 beds	486	48	33			33
≦99 beds	786	39	29			29
Special stratum	76	76	50			45	3	1			1
Subtotal	2454	812	642
Plastic surgery
University hospital	89	89	68			53	5	4	4		1	1
General hospital
≧500 beds	157	157	107			97	6	3																					1
400-499 beds	125	100	75			68	3	3							1
300-399 beds	127	52	38			36	2
200-299 beds	126	25	20			20
100-199 beds	186	19	13			13
≦99 beds	222	11	8			8
Special stratum	19	19	15			8	1	2	1		1					1			1
Subtotal	1051	472	344
Other special stratum	4	4	4			0	1														1			1						1
Total	7825	2283	1767
